# Supplementary material for: Efficient detection of a biomarker for infant jaundice by a europium(iii)-organic framework luminescence sensor
Source: Royal Society of Chemistry journal article supplement (doi:10.1039/c9ra08604h), 2019-01-01
Supplement: c9ra08604h1.pdf [file c9ra08604h1.pdf]

## Supporting information

### Efficient detection of biomarker for infant jaundice by a luminescent europium(III)- organic framework sensor

Ping Xu<sup>a</sup>, Han-Wen Yang<sup>a</sup>, Jia-Li Shi<sup>a</sup>, Bo Ding<sup>a</sup>, Xiao-Jun Zhao<sup>a, b, \*</sup>, En-Cui Yang<sup>a, \*</sup>

<sup>a</sup> Key Laboratory of Inorganic-Organic Hybrid Functional Material Chemistry, Ministry of Education, Tianjin Key Laboratory of Structure and Performance for Functional Molecules, College of Chemistry, Tianjin Normal University, Tianjin 300387, P. R. China. E-mail: [encui\\_yang@163.com](mailto:encui_yang@163.com), [xiaojun\\_zhao15@163.com](mailto:xiaojun_zhao15@163.com)

<sup>b</sup> Synergetic Innovation Center of Chemical Science and Engineering (Tianjin), Tianjin 300071, P. R. China

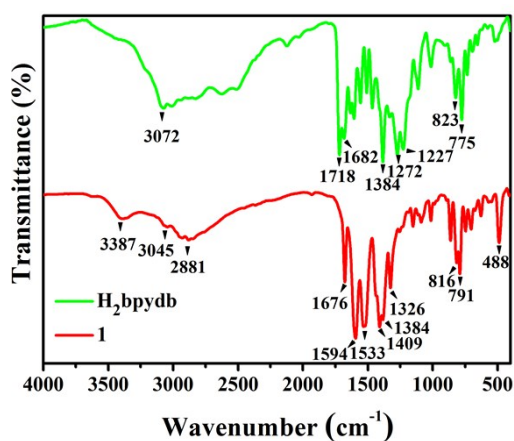

Fig. S1 FT-IR spectra of 1 and H<sub>2</sub>bpydb ligand.

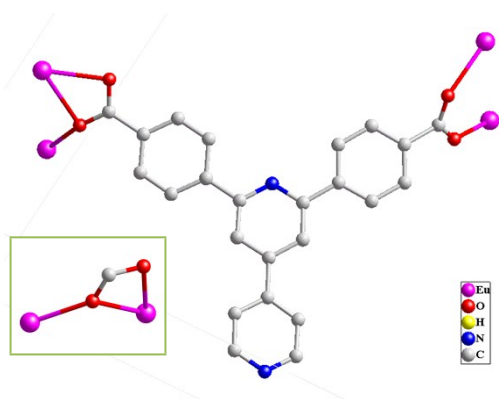

**Fig. S2** Binding modes of bpydb<sup>2-</sup> and formate ligands (insert) in **1**.

**Table S1** Selected hydrogen-bonding parameters for **1**<sup>a</sup>

| D–H···A                    | <i>d</i> (D–H) | <i>d</i> (H···A) | <i>d</i> (D···A) | <i>θ</i> (D–H···A) |
|----------------------------|----------------|------------------|------------------|--------------------|
| C16–H16···O6 <sup>#1</sup> | 0.93           | 2.37             | 3.251(10)        | 158                |
| C20–H20···O3 <sup>#2</sup> | 0.93           | 2.54             | 3.195(9)         | 128                |

<sup>a</sup> Symmetry codes: <sup>#1</sup> 1/2 + *x*, 1/2 – *y*, 1 – *z*; <sup>#2</sup> 3/2 – *x*, –1/2 + *y*, *z*.

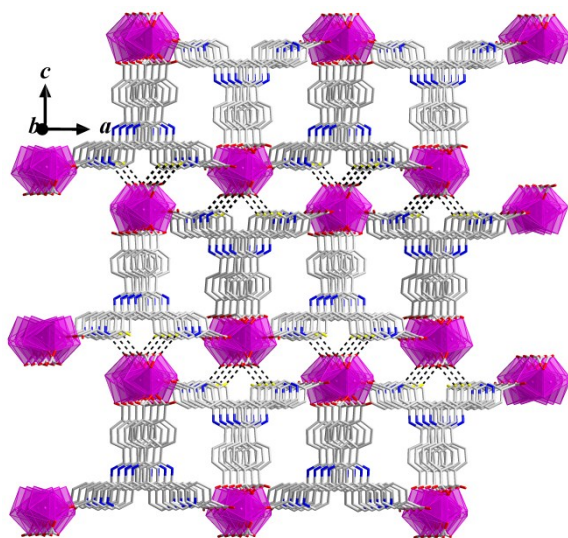

**Fig. S3** Three-dimensional supramolecular structure of **1**.

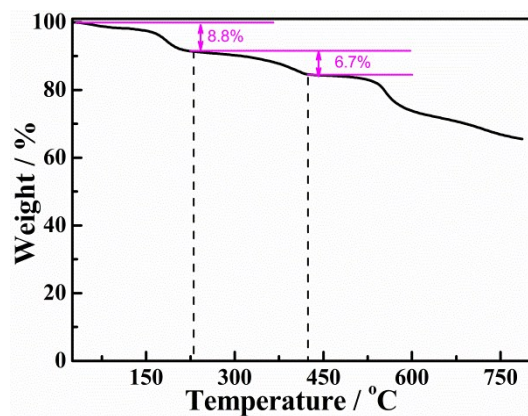

**Fig. S4** TGA curve of **1**.

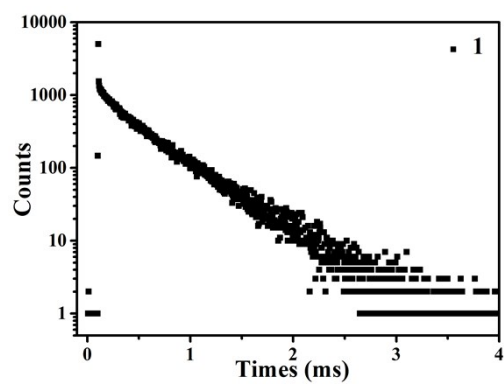

**Fig. S5** Fluorescent lifetime of **1** monitored at 616 nm in the solid state upon excitation at 432 nm.

**Table S2** Excitation wavelength-dependent luminescence lifetime ( $\tau$ ) and quantum yield (QY) of **1** in the solid-state

| $\lambda_{\text{ex}} / \text{nm}$ | 325  | 340  | 355  | 370  | 385  | 400  | 415  | 430  | 432  |
|-----------------------------------|------|------|------|------|------|------|------|------|------|
| $\tau_{616} / \mu\text{s}$        | 478  | 478  | 480  | 477  | 489  | 483  | 445  | 428  | 413  |
| QY / %                            | 6.73 | 6.08 | 5.54 | 5.38 | 4.21 | 3.89 | 3.05 | 2.85 | 2.85 |

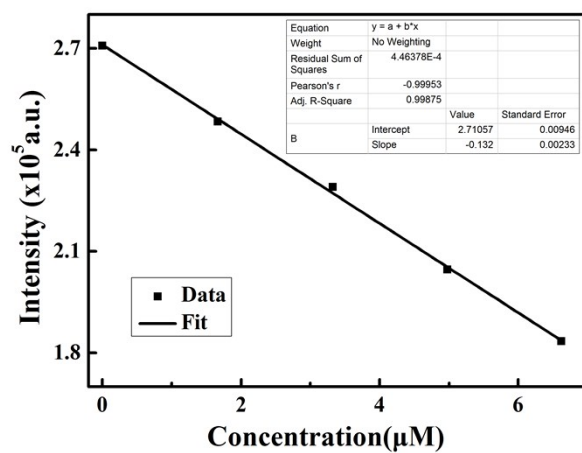

Fig. S6 Plot of luminescent intensity *versus* [bilirubin].



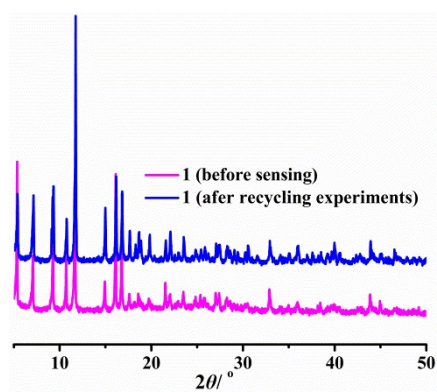

**Fig. S7** PXR D patterns of **1** before and after five recycling experiments for bilirubin sensing.

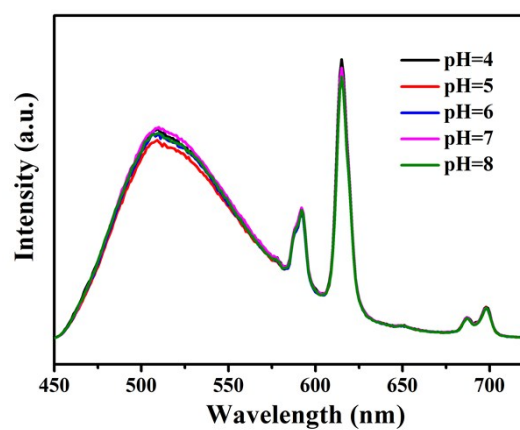

**Fig. S8** Emission spectra of **1** dispersed in water with different pH values ( $\lambda_{\text{ex}} = 432$  nm).

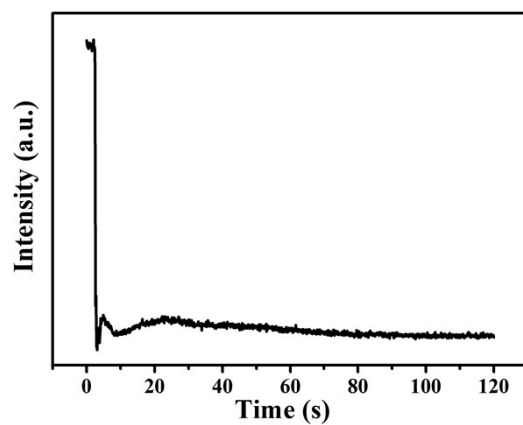

**Fig. S9** Time-dependent fluorescence intensity of **1** at 616 nm upon introduction of bilirubin in an aqueous solution with pH = 7.4.

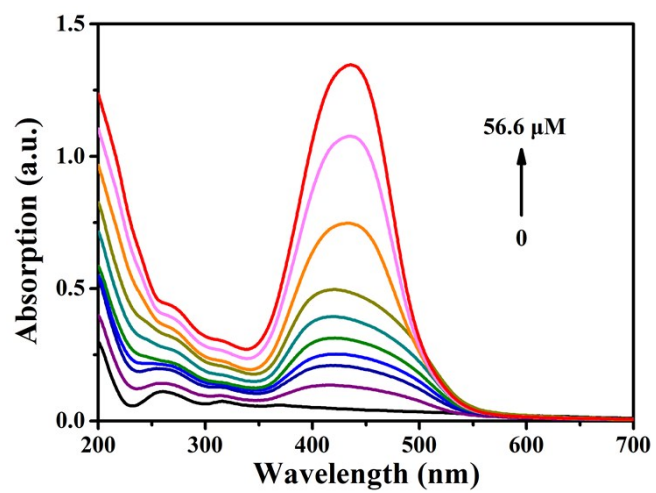

**Fig. S10** UV-vis absorption spectra of **1** in the presence of different concentrations of bilirubin.

**Table S3** Parameters used for the IFE correction of **1** in the presence of different concentrations of bilirubin

| $C_{\text{bilirubin}} / \mu\text{M}$ | $A_{\text{ex}}$ | $A_{\text{em}}$ | $I_{\text{obsd}}$ | $I_{\text{cor}}$ | $I_{\text{cor}}/I_{\text{obsd}}$ | $E_{\text{obsd}} (\%)$ | $E_{\text{cor}} (\%)$ |
|--------------------------------------|-----------------|-----------------|-------------------|------------------|----------------------------------|------------------------|-----------------------|
| 0                                    | 0.045           | 0.019           | 270870            | 290162           | 1.071                            | 0                      | 0                     |
| 3.32                                 | 0.132           | 0.010           | 229035            | 267766           | 1.169                            | 0.154                  | 0.077                 |
| 6.62                                 | 0.207           | 0.013           | 183430            | 233206           | 1.271                            | 0.323                  | 0.196                 |
| 9.90                                 | 0.251           | 0.015           | 165645            | 221017           | 1.334                            | 0.388                  | 0.238                 |
| 13.16                                | 0.309           | 0.015           | 148530            | 210361           | 1.416                            | 0.452                  | 0.275                 |
| 16.39                                | 0.388           | 0.013           | 129360            | 197845           | 1.529                            | 0.522                  | 0.318                 |
| 19.61                                | 0.489           | 0.018           | 115330            | 195372           | 1.694                            | 0.574                  | 0.327                 |
| 32.26                                | 0.746           | 0.012           | 91680             | 193892           | 2.115                            | 0.662                  | 0.332                 |
| 44.59                                | 1.074           | 0.013           | 69800             | 190639           | 2.731                            | 0.742                  | 0.343                 |
| 56.60                                | 1.340           | 0.013           | 58230             | 190397           | 3.270                            | 0.785                  | 0.344                 |

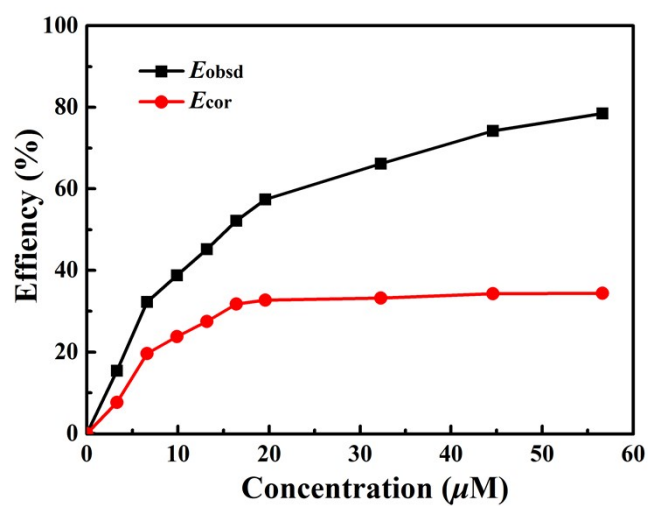

**Fig. S11** Observed ( $E_{\text{obsd}}$ ) and corrected ( $E_{\text{cor}}$ ) fluorescence quenching efficiency of **1** after the addition of different concentrations of bilirubin.

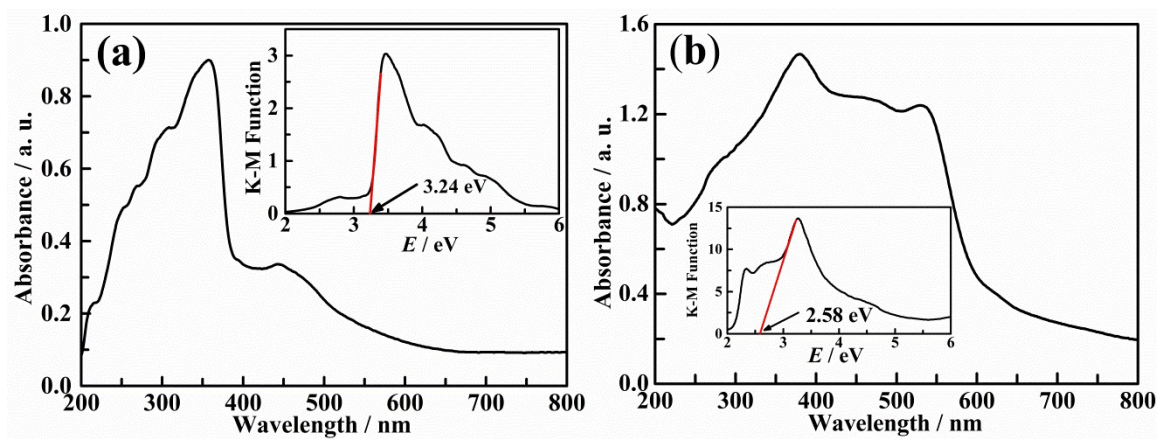

**Fig. S12** UV-vis diffuse reflectance spectra of **1** (a) and bilirubin (b) (Inset: Plots of K-M function vs. energy for **1** and bilirubin).
